# Supplementary material
Source: MDPI journal article supplement (https://www.mdpi.com/2076-3417/13/5/2824)
Supplement: s1 [file s1]

## Supplementary Material

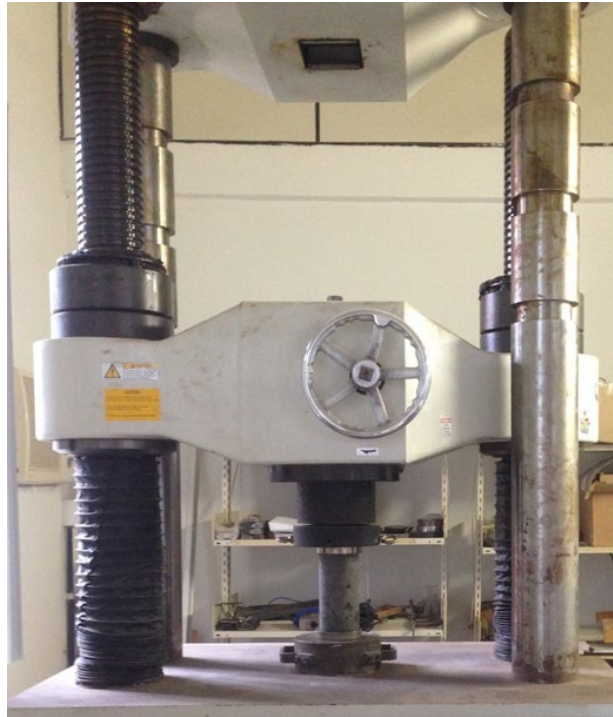

**Figure S1.** Concrete specimen during the compressive strength test.

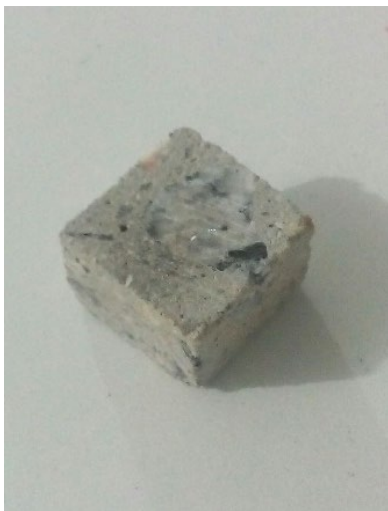

(a)

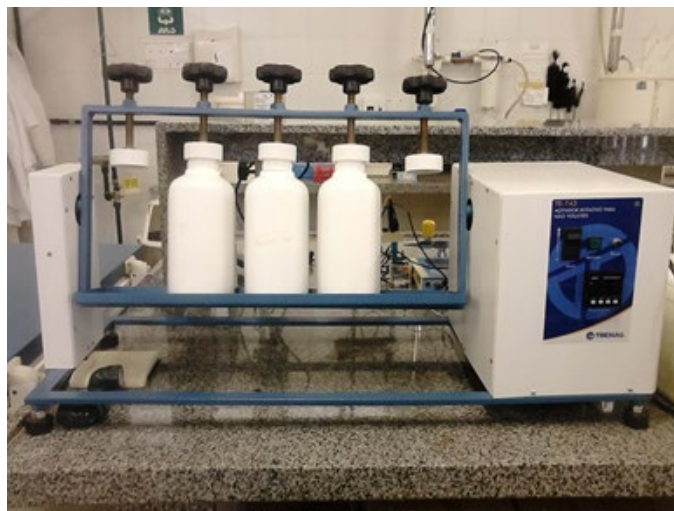

(b)

**Figure S2.** Acid attack resistance test. (a) concrete sample tested (20 x 20 x 14 mm); (b) experimental setup.

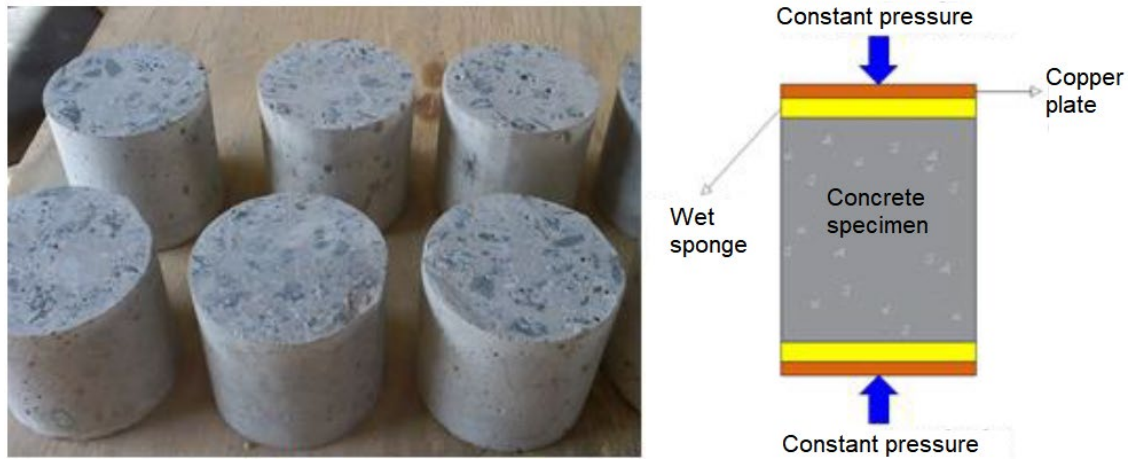

**Figure S3.** Concrete specimens and schematic illustration of the electrical resistivity test.

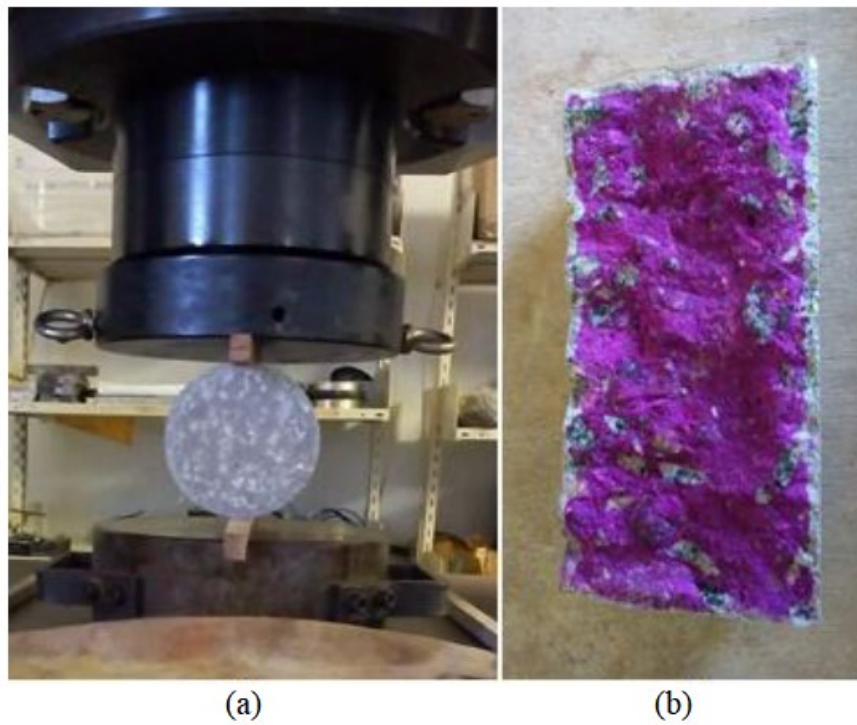

**Figure S4.** Carbonation depth test. (a) specimen splitting procedure; (b) phenolphthalein colorimetric method.
